# Supplementary material for: Large-scale synthesis of ultrafine Fe3C nanoparticles embedded in mesoporous carbon nanosheets for high-rate lithium storage
Source: Royal Society of Chemistry journal article supplement (doi:10.1039/d1ra08516f), 2022-01-01
Supplement: d1ra08516f1.pdf [file d1ra08516f1.pdf]

## Supporting Information

# Large-scale synthesis of ultrafine Fe<sub>3</sub>C nanoparticles embedded in mesoporous carbon nanosheets for high-rate lithium storage

*Ying Yu<sup>a,b,c,†</sup>, Xuanli Wang<sup>a,†</sup>, Hongkun Zhang<sup>b,c,\*</sup>, Zhiqin Cao<sup>d</sup>,*

*Haoyang Wu<sup>a,\*</sup>, Baorui Jia<sup>a</sup>, Jun Jun Yang<sup>a</sup>, Xuanhui Qu<sup>a,e</sup>, Mingli Qin<sup>a,e,\*</sup>*

<sup>a</sup> Institute for Advanced Materials and Technology, University of Science and Technology Beijing, Beijing 100083, China

<sup>b</sup> China United Test & Certification Co., Ltd

<sup>c</sup> GRINM Group Corporation Limited

<sup>d</sup> College of Vanadium and Titanium, Pan Zhihua University, Pan Zhihua 617000, China

<sup>e</sup> Beijing Advanced Innovation Center of Materials Genome Engineering, University of Science and Technology Beijing, Beijing 100083, China

†These authors contributed equally to this work.

Corresponding author:

E-mail:

zhk@cutc.net (Hongkun Zhang),

wuhaoyang@ustb.edu.cn (Haoyang Wu),

qinml@mater.ustb.edu.cn (Mingli Qin).

## Supplementary Figures

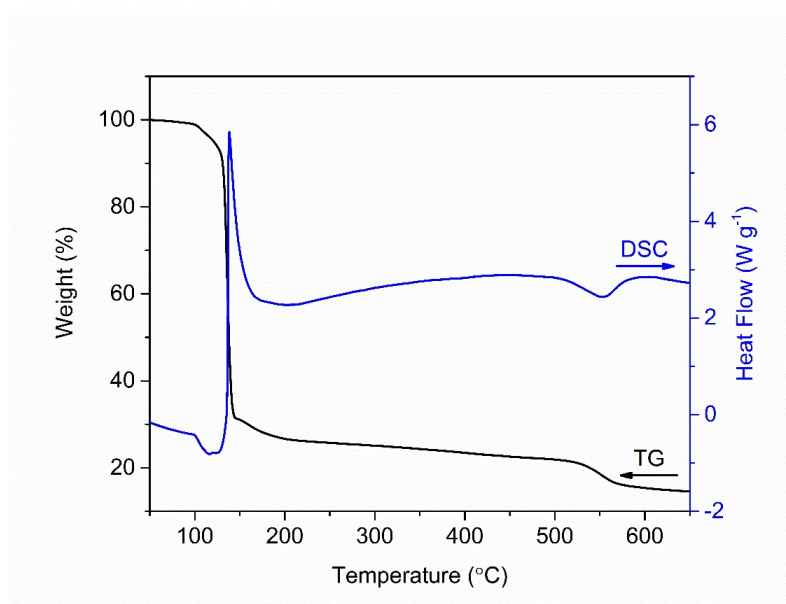

**Fig. S1** TG -DSC curves of SCS precursor.

A violent exothermic reaction takes place at about 150 °C accompanied by about 70% weight loss, which is attributed to the thermally induced redox reaction between iron nitrate and glycine. With the heating temperature increasing, another small endothermic peak appears at about 550°C, with a loss of about 15%. This may be ascribed to the oxidation of carbon generated by the decomposition of glucose. Further increase in temperature does not change the weight, implying the end of reaction.

## Supplementary Tables

**Table. S1** The discharge capacity comparison between this work and related reference.

| Ref                                             | anode material                                                                     | reversible capacity/mAh/g | current density/mA/g |
|-------------------------------------------------|------------------------------------------------------------------------------------|---------------------------|----------------------|
| this work                                       | Fe <sub>3</sub> C@MCNSs                                                            | <b>706 (300cycles)</b>    | <b>1000</b>          |
| Electrochim. Acta, 2013,87:180-185              | Fe@Fe <sub>3</sub> C/C                                                             | <b>500 (30cycles)</b>     | <b>50</b>            |
| ACS Nano, 2014,8:3939-3946                      | Fe <sub>2</sub> O <sub>3</sub> /Fe <sub>3</sub> C-graphene heterogeneous thin film | <b>983 (100cycles)</b>    | <b>0.17C</b>         |
| ACS Nano,2015,9:3369-3376.                      | Fe <sub>3</sub> O <sub>4</sub> @Fe <sub>3</sub> C core@shell carbon nanospindles   | <b>530.2</b>              | <b>500</b>           |
| Nano Research, 2017,10(9):3164-3177.            | Fe <sub>2</sub> O <sub>3</sub> /Fe <sub>3</sub> C-porous carbon nanosheets         | <b>857 (100cycles)</b>    | <b>100</b>           |
| Chemical Engineering Journal, 2014,258:93-100   | N-doped graphene/Fe-Fe <sub>3</sub> C                                              | <b>607 (100cycles)</b>    | <b>1000</b>          |
| Electrochimica Acta, 2015,180:78-85             | Fe <sub>3</sub> C/porous carbon sphere                                             | <b>533.6 (250cycles)</b>  | <b>100</b>           |
| Electrochim Acta,2014,116:292-299               | Fe <sub>3</sub> C embedded into nitrogen-doped carbon                              | <b>750 (120cycles)</b>    | <b>100</b>           |
| Journal of Alloys and Compounds, 2021,881:10661 | Fe <sub>3</sub> C/porous carbon                                                    | <b>584 (150cycles)</b>    | <b>100</b>           |
| Electrochimica Acta, 2015,178:468-475           | Fe <sub>3</sub> C@carbon nanocapsules/expanded graphite                            | <b>451.5</b>              | <b>200</b>           |
